# Supplementary material for: Mining the plasma-proteome associated genes in patients with gastro-esophageal cancers for biomarker discovery
Source: PubMed Central journal article supplement (PMC8027878; doi:10.1038/s41598-021-87037-w), 2021-04-07
Supplement: 41598_2021_87037_MOESM1_ESM.pdf [file 41598_2021_87037_MOESM1_ESM.pdf]

## Mining the Plasma-Proteome Associated Genes in Patients with Gastro-Esophageal Cancers for Biomarker Discovery

Frederick S. Vizeacoumar<sup>1</sup>, Hongyu Guo<sup>2</sup>, Lynn Dwernychuk<sup>3</sup>, Adnan Zaidi<sup>3,4</sup>, Andrew Freywald<sup>1</sup>, Fang-Xiang Wu<sup>2,5,6</sup>, Franco J. Vizeacoumar<sup>3,4</sup>\$ and Shahid Ahmed<sup>3,4</sup>\$

<sup>1</sup>Department of Pathology and Laboratory Medicine, College of Medicine, University of Saskatchewan, Saskatoon, Canada, <sup>2</sup>Division of Biomedical Engineering, University of Saskatchewan, Saskatoon, Canada. <sup>3</sup>Cancer Research, Saskatchewan Cancer Agency, Saskatoon, Canada, <sup>4</sup>Division of Oncology, University of Saskatchewan, Saskatoon, Canada, <sup>5</sup>Department of Mechanical Engineering, University of Saskatchewan, Canada, <sup>6</sup>Department of Computer Science, University of Saskatchewan, Canada.

**Short Title:** Predictive biomarkers for gastro-esophageal cancers

**Key words:** Stomach cancer, esophageal cancer, gastroesophageal cancer, biomarkers, plasma proteome

### **\$ Correspondence to:**

Shahid Ahmed, MD, PhD, FRCPC, FACP  
Saskatoon Cancer Center  
University of Saskatchewan  
20 Campus Drive  
Saskatoon, SK  
Canada, S7N4H4  
Ph: 306-655-2710  
Fax: 306-655-0633  
Email: [shahid.ahmed@saskcancer.ca](mailto:shahid.ahmed@saskcancer.ca)

Franco J. Vizeacoumar, BSc, PhD  
Saskatoon Cancer Center  
University of Saskatchewan  
107 Wiggins Road  
Saskatoon, SK  
Canada, S7N5E5  
Ph: 306-966-7010  
Fax: 306-966-7047  
Email: [franco.vizeacoumar@usask.ca](mailto:franco.vizeacoumar@usask.ca)

## Supplementary Tables

**Supplementary Table 1: P-values for the genes in Figure 1B compared to Normal samples and number of samples in Normal and each stages of Esophageal Carcinoma (ESCA)**

| Esophageal Carcinoma (ESCA) |        |          |          |          |          |               |
|-----------------------------|--------|----------|----------|----------|----------|---------------|
| Gene Symbol                 | Normal | Stage 1  | Stage 2  | Stage 3  | Stage 4  | Stage Unknown |
| BIRC5                       |        | 7.21E-06 | 7.95E-08 | 2.38E-07 | 9.85E-05 | 2.10E-06      |
| APOC2                       |        | 4.77E-06 | 1.55E-07 | 1.67E-07 | 9.85E-05 | 3.48E-06      |
| CENPF                       |        | 2.37E-05 | 9.09E-08 | 3.10E-07 | 9.85E-05 | 5.71E-06      |
| STMN1                       |        | 1.32E-05 | 1.89E-07 | 2.38E-07 | 1.78E-04 | 7.90E-06      |
| HNRNPC                      |        | 1.04E-04 | 1.55E-07 | 3.39E-07 | 9.85E-05 | 1.09E-05      |
| No. of Samples              | 11     | 18       | 78       | 56       | 9        | 24            |

**Supplementary Table 2: P-values for the genes in Figure 1D compared to Normal samples and number of samples in Normal and each stages of Stomach Adenocarcinoma (STAD)**

| Stomach Adenocarcinoma (STAD) |        |          |          |          |          |               |
|-------------------------------|--------|----------|----------|----------|----------|---------------|
| Gene Symbol                   | Normal | Stage 1  | Stage 2  | Stage 3  | Stage 4  | Stage Unknown |
| CST1                          |        | 3.69E-15 | 9.10E-19 | 7.93E-19 | 9.89E-13 | 3.51E-09      |
| INHBA                         |        | 7.12E-12 | 5.73E-18 | 3.55E-18 | 1.45E-12 | 1.22E-08      |
| ACAN                          |        | 1.10E-12 | 1.18E-17 | 7.63E-18 | 2.62E-12 | 5.09E-09      |
| HSP90AB1                      |        | 4.77E-14 | 4.23E-16 | 8.98E-18 | 2.82E-12 | 2.03E-08      |
| HSPD1                         |        | 2.32E-12 | 8.07E-16 | 4.93E-18 | 1.16E-12 | 4.26E-09      |
| No. of Samples                | 35     | 57       | 123      | 169      | 41       | 25            |

**Supplementary Table 3: P-values and the stages for the genes in Figure 2A compared to Normal samples in ESCA**

| Top stage specific up-regulation |             |         |
|----------------------------------|-------------|---------|
| Stage                            | Gene Symbol | P-Value |
| 1                                | CPS1        | 0.003   |
| 1                                | PNP         | 0.007   |
| 1                                | SERPINB8    | 0.042   |
| 1                                | EHD1        | 0.046   |
| 2                                | MSN         | 0.003   |
| 2                                | KRT5        | 0.004   |
| 2                                | TNC         | 0.007   |
| 2                                | NAP1L4      | 0.018   |
| 4                                | CYCS        | 0.014   |
| 4                                | PON3        | 0.014   |
| 4                                | ACPP        | 0.047   |
| 4                                | RPL22       | 0.047   |

**Supplementary Table 4: P-values and the stages for the genes in Figure 2B compared to Normal samples in STAD**

| Top stage specific up regulation |       |         |
|----------------------------------|-------|---------|
| Stage                            | Gene  | P-Value |
| 1                                | PYGB  | 0.043   |
| 2                                | TNF   | 0.02    |
| 3                                | HLA-A | 0.05    |
| 4                                | EFNB2 | 0.001   |

## Supplementary Tables

**Supplementary Table 5: P-values and the stages for the genes in Figure 4D compared to Normal samples in STAD**

| Top stage specific down regulation |          |          |
|------------------------------------|----------|----------|
| Stage                              | Gene     | P-Value  |
| 1                                  | C1R      | 2.34E-04 |
| 1                                  | A2M      | 3.15E-04 |
| 1                                  | LTBP1    | 3.15E-04 |
| 1                                  | SERPING1 | 4.23E-04 |
| 1                                  | BASP1    | 4.88E-04 |
| 3                                  | SERPINB6 | 2.00E-03 |
| 3                                  | G0S2     | 1.80E-02 |
| 3                                  | HSD17B10 | 2.50E-02 |
| 3                                  | ECM1     | 2.60E-02 |
| 3                                  | PRDX1    | 2.80E-02 |

**Supplementary Table 6: P-values for the genes in Figure 4F compared to Normal samples in each stages for Stomach Adenocarcinoma (STAD)**

| Top progressively down-regulated genes |          |          |          |          |               |
|----------------------------------------|----------|----------|----------|----------|---------------|
| Gene Symbol                            | Stage 1  | Stage 2  | Stage 3  | Stage 4  | Stage Unknown |
| ACAA1                                  | 7.57E-06 | 7.34E-06 | 1.98E-07 | 1.98E-04 | 4.86E-04      |
| AZGP1                                  | 5.00E-01 | 3.83E-01 | 1.40E-01 | 2.90E-01 | 2.01E-01      |
| BLVRB                                  | 2.66E-06 | 1.02E-07 | 3.66E-09 | 1.60E-05 | 1.03E-05      |
| CYB5A                                  | 2.00E-03 | 2.76E-05 | 1.12E-07 | 2.75E-05 | 8.20E-04      |
| EPHX2                                  | 6.30E-04 | 2.89E-06 | 1.98E-08 | 5.04E-08 | 1.87E-05      |
| FBP1                                   | 1.42E-01 | 9.10E-02 | 5.50E-02 | 1.22E-01 | 1.84E-01      |
| REG1A                                  | 2.68E-01 | 1.05E-01 | 5.20E-02 | 1.82E-01 | 1.50E-01      |
| SECTM1                                 | 1.34E-01 | 5.50E-02 | 1.00E-02 | 3.90E-02 | 6.30E-02      |
| SELENBP1                               | 4.19E-06 | 1.14E-07 | 1.20E-08 | 3.05E-06 | 9.44E-05      |
| TPPP3                                  | 4.87E-01 | 4.50E-02 | 1.30E-02 | 3.90E-02 | 4.50E-02      |
